# Supplementary material for: Immune dysregulation is an important factor in the underlying complications in Influenza infection. ApoH, IL-8 and IL-15 as markers of prognosis
Source: PubMed Central journal article supplement (PMC11339618; doi:10.3389/fimmu.2024.1443096), 2024-07-26
Supplement: Table_1.pdf [file Table_1.pdf]

**Supplementary Table S1.** Cytokines in the reference population of healthy people. The mean values and the standard deviation are indicated, as well as the cut-off point to consider that a sample has high levels of each cytokine.

| Cytokines       | Mean | Standard Deviation | Cut off High levels |
|-----------------|------|--------------------|---------------------|
| IFN alfa pg/mL  | 8,1  | 6.63               | >21.4               |
| IFN gamma pg/mL | 5.8  | 6.96               | >19.8               |
| IL-2 pg/mL      | 0.8  | 1.49               | >3.8                |
| IL-6 pg/mL      | 17.6 | 23.22              | >64                 |
| IL-10 pg/mL     | 6.1  | 13.62              | >3.3                |
| IL-15 pg/mL     | 1.31 | 3.14               | >7.6                |
| IL-8 pg/mL      | 6.1  | 2.9                | >11.9               |
