# Supplementary material for: Immune dysregulation is an important factor in the underlying complications in Influenza infection. ApoH, IL-8 and IL-15 as markers of prognosis
Source: PubMed Central journal article supplement (PMC11339618; doi:10.3389/fimmu.2024.1443096), 2024-07-26
Supplement: Table_2.pdf [file Table_2.pdf]

**Supplementary Table S2.** Characteristics of Influenza patients

| CONDITION           | Number / median | % / IQR |
|---------------------|-----------------|---------|
| Sex (women)         | 112             | (54,4%) |
| Age (years)         | 75,5            | (62-85) |
| Smoker              | 21              | (10,2%) |
| Former smoker       | 52              | (25,2%) |
| Obesity             | 46              | (22,3%) |
| COPD                | 43              | (20,9%) |
| Diabetes Mellitus   | 49              | (23,8%) |
| IFNa elevated       | 22              | (9,1%)  |
| IFNg elevated       | 19              | (9,3%)  |
| IL8 elevated        | 76              | (50,3%) |
| IL10 elevated       | 47              | (23%)   |
| IL15 elevated       | 59              | (28,9%) |
| IL2 elevated        | 8               | (3,9%)  |
| IL6 elevated        | 29              | (14,2%) |
| MPO elevated        | 47              | (32%)   |
| APOH LOW            | 39              | (18,9%) |
| DNase LOW           | 182             | (88,8%) |
| CRP elevated        | 44              | (21,6%) |
| Ferritin elevated   | 64              | (33,5%) |
| Leucocytosis        | 60              | (29,4%) |
| Leucopenia          | 10              | (4,9%)  |
| Lymphopenia 1000    | 133             | (65,2%) |
| Thrombopenia        | 41              | (20%)   |
| Days hospitalized   | 12,5            | (6-14)  |
| Treated in ICU      | 47              | (22,8%) |
| Respiratory failure | 61              | (29,6%) |
| Septic shock        | 20              | (9,7%)  |
| Exitus at 30 days   | 34              | (16,5%) |

COPD: chronic obstructive pulmonary disease; MPO: myeloperoxidase; CRP: C-reactive protein; ICU: Intensive Care Unit
