# Supplementary material for: Immune dysregulation is an important factor in the underlying complications in Influenza infection. ApoH, IL-8 and IL-15 as markers of prognosis
Source: PubMed Central journal article supplement (PMC11339618; doi:10.3389/fimmu.2024.1443096), 2024-07-26
Supplement: Table_3.pdf [file Table_3.pdf]

**Supplementary Table S3.** Cytokines. MPO, ApoH and DNase in influenza patients versus reference population of healthy people. The mean values and the standard deviation are indicated, as well as the cut-off point to consider that a sample has high levels of each cytokine.

| Biomarker          | Reference population |             | Influenza patients |            | Hodges-Lehmann<br>median difference | Relative median<br>difference | P value |
|--------------------|----------------------|-------------|--------------------|------------|-------------------------------------|-------------------------------|---------|
|                    | Median (IQR)         |             | Median (IQR)       |            |                                     |                               |         |
| IFN $\alpha$ pg/mL | 7.0                  | (2.5-12.3)  | 1.3                | (1.1-1.6)  | -3.7                                | -0.49                         | < 0.001 |
| IFN $\gamma$ pg/mL | 4.8                  | (1.8-7.0)   | 0.5                | (0.4-4.9)  | -2.1                                | -0.43                         | 0.002   |
| IL-8 pg/mL         | 5.0                  | (3.5-9.0)   | 14.8               | (3.5-35.8) | 8.1                                 | 0.55                          | 0.002   |
| IL-10 pg/mL        | 0.9                  | (0.9-0.9)   | 10.8               | (1.8-31.7) | 7.7                                 | 0.71                          | < 0.001 |
| IL-15 pg/mL        | 0.2                  | (0.17-0.17) | 2.3                | (0.3-7.8)  | 0.97                                | 0.41                          | < 0.001 |
| IL-2 pg/mL         | 0.08                 | (0.08-1.26) | 0.08               | (0.02-0.1) | -0.06                               | -0.75                         | < 0.001 |
| IL-6 pg/mL         | 9.0                  | (0.08-1.26) | 9.0                | (3.3-41.4) | -0.05                               | -0.01                         | 0.306   |
| MPO                | 396                  | (266-708)   | 1154               | (486-2379) | 711                                 | 0.62                          | < 0.001 |
| ApoH (ug/mL)       | 209                  | (168-256)   | 177                | (103-281)  | -30                                 | -0.14                         | 0.080   |
| DNase (ng/mL)      | 108                  | (77-138)    | 8                  | (4-8)      | -99                                 | -0.93                         | < 0.001 |

MPO: myeloperoxidase
