# Supplementary material for: Immune dysregulation is an important factor in the underlying complications in Influenza infection. ApoH, IL-8 and IL-15 as markers of prognosis
Source: PubMed Central journal article supplement (PMC11339618; doi:10.3389/fimmu.2024.1443096), 2024-07-26
Supplement: Table_4.pdf [file Table_4.pdf]

**Supplementary Table S4.** Multivariate analysis of the type of influenza infection and the factors associated with poor disease outcome previously analyzed in the study described in Table 2 B.

| <b>BAD EVOLUTION</b>       |                   |               |                |
|----------------------------|-------------------|---------------|----------------|
| <b>MULTIVARIATE</b>        |                   |               |                |
| <b>Biomarker</b>           | <b>Odds ratio</b> | <b>95% CI</b> | <b>P value</b> |
| Age (years)                | 0,99              | (0,96-1,01)   | 0,191          |
| Smoker                     | 2,84              | (0,83-9,64)   | 0,095          |
| Obesity                    | 0,47              | (0,2-1,09)    | 0,079          |
| Low ApOH                   | 4,51              | (1,73-11,74)  | 0,002          |
| CRP elevated               | 2,51              | (1,06-5,97)   | 0,037          |
| Severe lymphopenia         | 1,82              | (0,9-3,71)    | 0,098          |
| Ferritin elevated          | 2,35              | (1,13-4,87)   | 0,022          |
| Serotipe influenza A virus | 0,68              | (0,43-1,07)   | 0,097          |
| Area under ROC curve       | 0,794             | (0,730-0,850) |                |

CRP: C Reactive Protein
