# Supplementary material for: Immune dysregulation is an important factor in the underlying complications in Influenza infection. ApoH, IL-8 and IL-15 as markers of prognosis
Source: PubMed Central journal article supplement (PMC11339618; doi:10.3389/fimmu.2024.1443096), 2024-07-26
Supplement: Table_5.pdf [file Table_5.pdf]

**Supplementary Table S5.** Multivariate analysis of the markers associated with respiratory failure detected in the univariate analysis of the 61 influenza patients who followed this evolution versus those who maintained adequate ventilation.

| Biomarker            | Respiratory failure<br>UNIVARIATE |              | Respiratory failure<br>MULTIVARIATE |               | P value |
|----------------------|-----------------------------------|--------------|-------------------------------------|---------------|---------|
|                      | Odds ratio                        | 95% CI       | Odds ratio                          | 95% CI        |         |
| Age (years)          | 0.98                              | (0.96-0.99)  | 0.98                                | (0.96-1.01)   | 0.158   |
| Smoker               | 5.87                              | (2.24-15.43) | 7.32                                | (1.22-44.06)  | 0.030   |
| COPD                 | 2.59                              | (1.29-5.19)  | 3.16                                | (1.05-9.51)   | 0.041   |
| IL8 elevated         | 2.69                              | (1.28-5.65)  | 1.63                                | (0.67-3.93)   | 0.280   |
| IL10 elevated        | 2.36                              | (1.2-4.65)   | 2.39                                | (0.92-6.2)    | 0.072   |
| IL15 elevated        | 0.44                              | (0.21-0.91)  | 0.30                                | (0.1-0.89)    | 0.029   |
| Low ApoH             | 4.25                              | (2.05-8.79)  | 4.40                                | (1.51-12.84)  | 0.007   |
| CRP elevated         | 2.42                              | (1.21-4.83)  | 2.06                                | (0.76-5.58)   | 0.157   |
| Area under ROC curve |                                   |              | 0.792                               | (0.718-0.854) |         |

COPD: chronic obstructive pulmonary disease; CRP: C-reactive protein.
